# Supplementary material for: Ultrathin oxide shell coating of metal nanoparticles using ionic liquid/metal sputtering
Source: Royal Society of Chemistry journal article supplement (doi:10.1039/c4ta06643j), 2015-01-01
Supplement: c4ta06643j1.pdf [file c4ta06643j1.pdf]

## Supporting Information for

# Ultrathin Oxide Shell Coating of Metal Nanoparticles Using Ionic Liquid/Metal Sputtering

Tsukasa Torimoto,<sup>a\*</sup> Yasuhiro Ohta,<sup>a</sup> Kazuki Enokida,<sup>a</sup> Daisuke Sugioka,<sup>a</sup>  
Tatsuya Kameyama,<sup>a</sup> Takahisa Yamamoto,<sup>a</sup> Tamaki Shibayama,<sup>b</sup> Kazuki Yoshii,<sup>c</sup>  
Tetsuya Tsuda,<sup>c</sup> and Susumu Kuwabata<sup>c\*</sup>

<sup>a</sup>*Graduate School of Engineering, Nagoya University, Furo-cho, Chikusa-ku, Nagoya 464-8603, Japan.*

<sup>b</sup>*Center for Advanced Research of Energy Conversion Materials, Hokkaido University, Sapporo  
060-8628, Japan*

<sup>c</sup>*Graduate School of Engineering, Osaka University, 2-1 Yamada-oka, Suita, Osaka 565-0871, Japan.*

E-mails: torimoto@apchem.nagoya-u.ac.jp, kuwabata@chem.eng.osaka-u.ac.jp

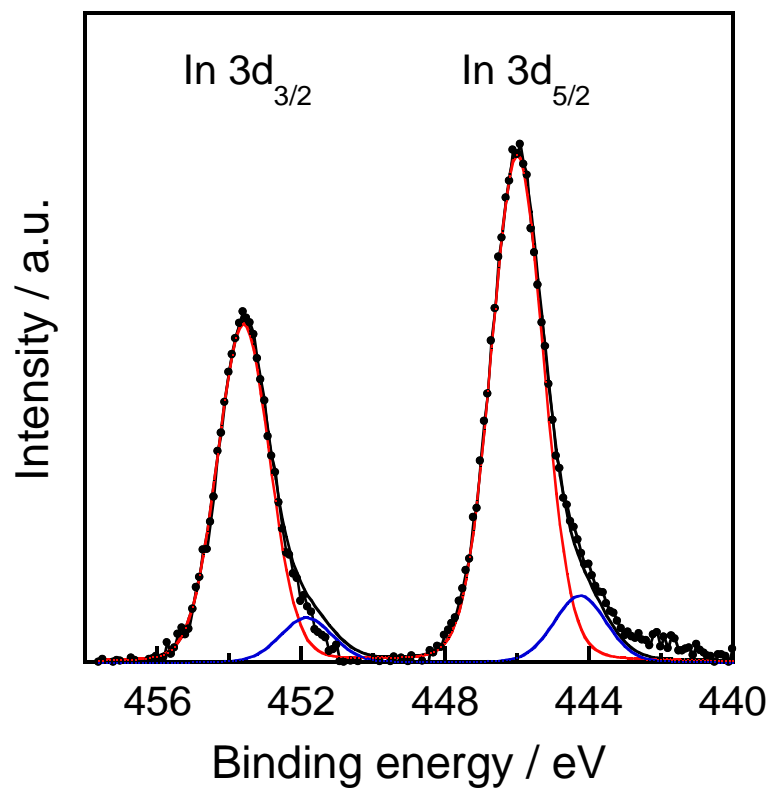

**Fig. S1** Representative XPS spectrum of In in the as-prepared Au@In<sub>2</sub>O<sub>3</sub>.

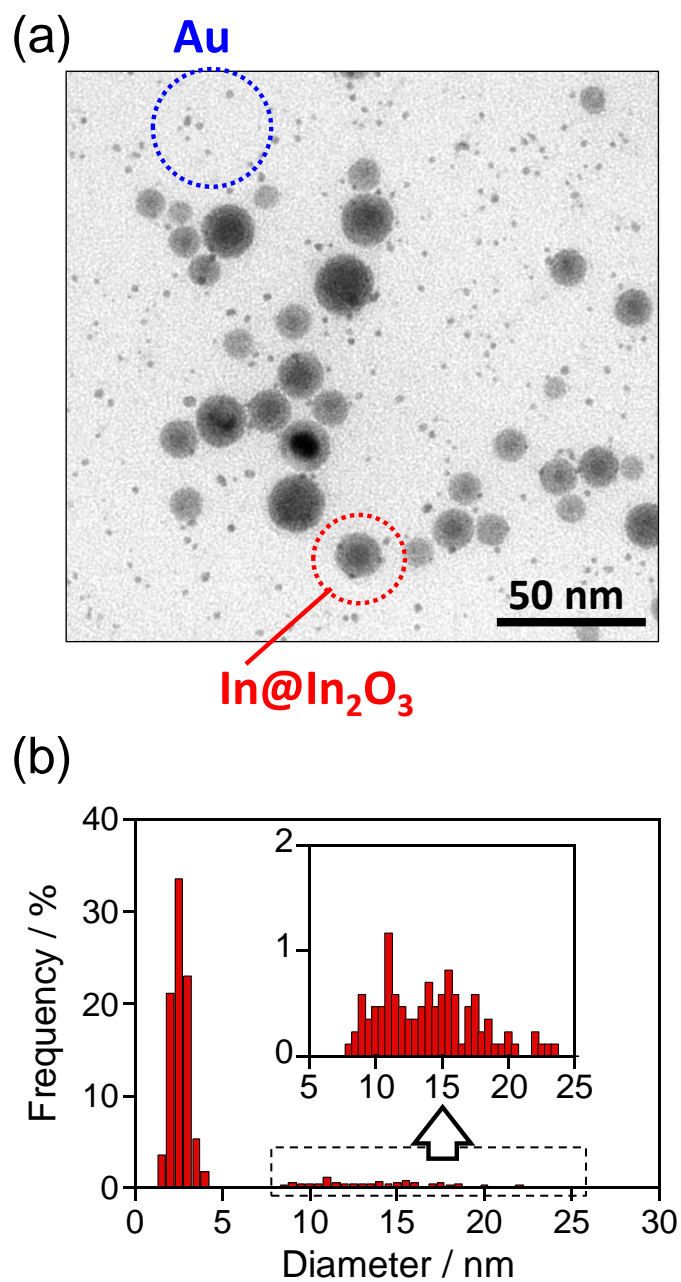

**Fig. S2** (a) TEM image of particles prepared by sequential sputter deposition of In and Au in EMI-BF<sub>4</sub>. (b) Size distribution of the particles shown in panel a.

**(a) as-prepared**

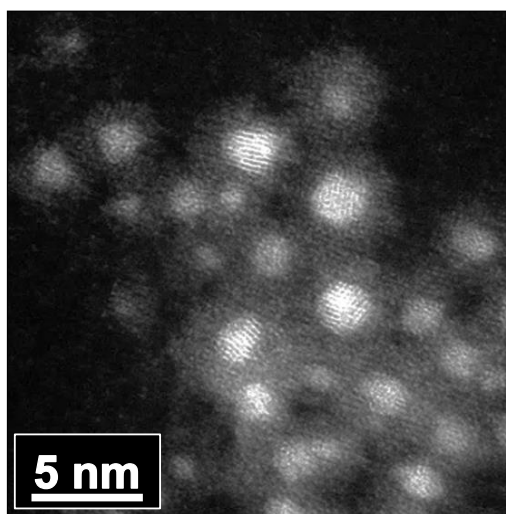

**(b) 100 °C**

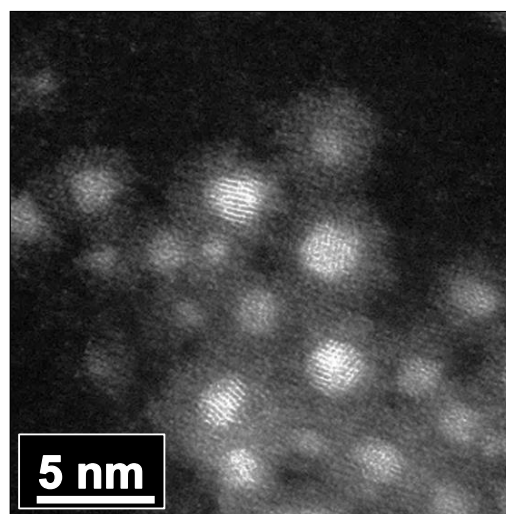

**(c) 200 °C**

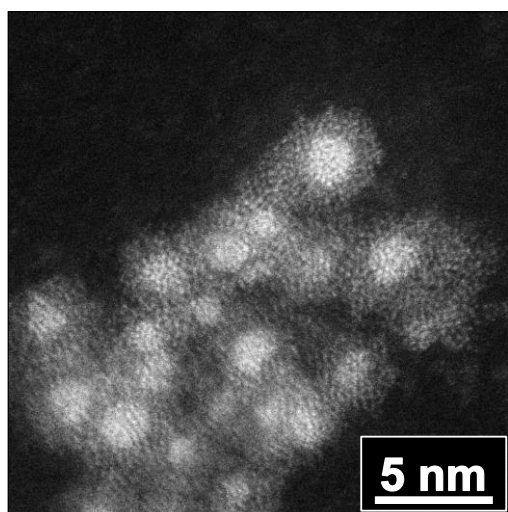

**(d) 250 °C**

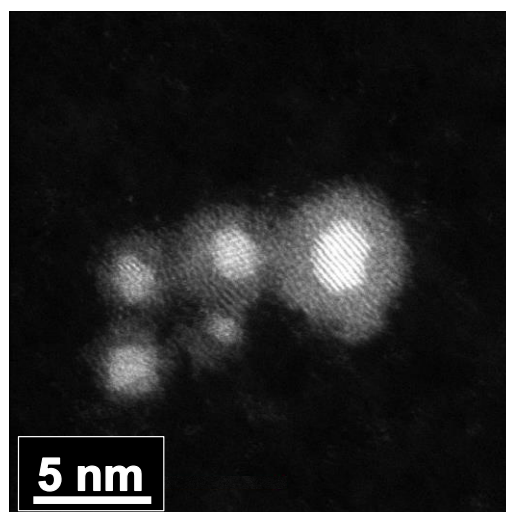

**Fig. S3** HAADF-STEM images of heat-treated AuPd@In<sub>2</sub>O<sub>3</sub> presenting a 0.95-nm-thick In<sub>2</sub>O<sub>3</sub> shell. As-prepared (a) and heat-treated particles at 100 (b), 200 (c), and 250 °C (d).

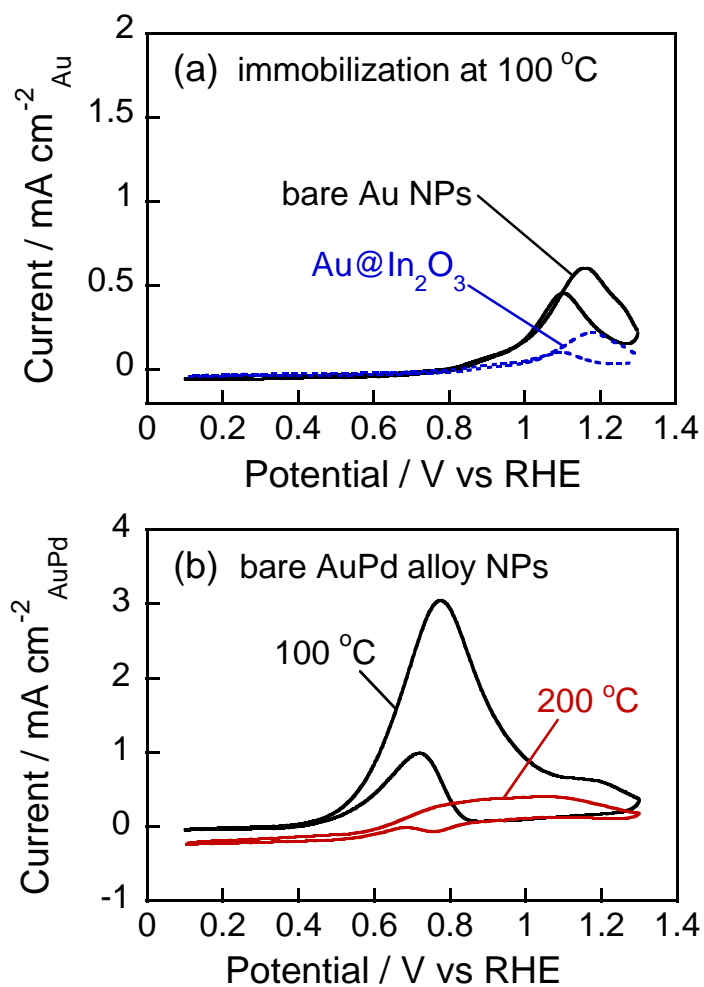

**Fig. S4** Cyclic voltammograms for ethanol oxidation in 0.50 mol dm<sup>-3</sup> KOH aqueous solution containing 0.50 mol dm<sup>-3</sup> ethanol. HOPG electrodes used were modified with bare Au or Au@In<sub>2</sub>O<sub>3</sub> particles at 100 °C (a) and modified with bare AuPd particles at 100 or 200 °C (b). Au@In<sub>2</sub>O<sub>3</sub> particles were prepared by the In sputtering for 10 min.

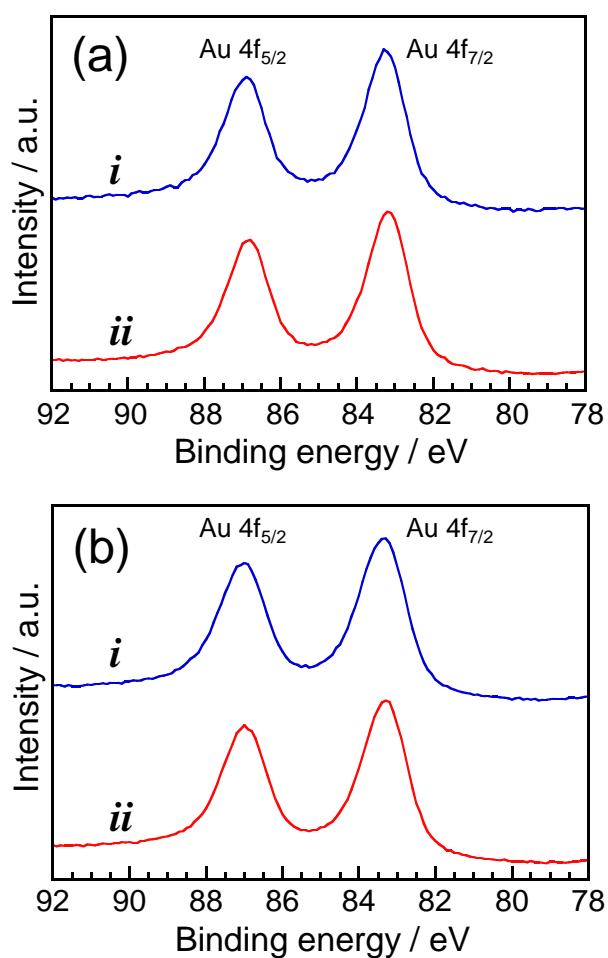

**Fig. S5** XPS spectra for Au 4f of bare AuPd particles (a) and AuPd@In<sub>2</sub>O<sub>3</sub> particles covered with a 0.79-nm-thick In<sub>2</sub>O<sub>3</sub> shell (b) immobilized on HPOG electrodes at 100 °C. The measurements were carried out (i) before and (ii) after cyclic voltammogram measurement shown in Fig. 7b with 100 cycles.

(a) bare Pt/C

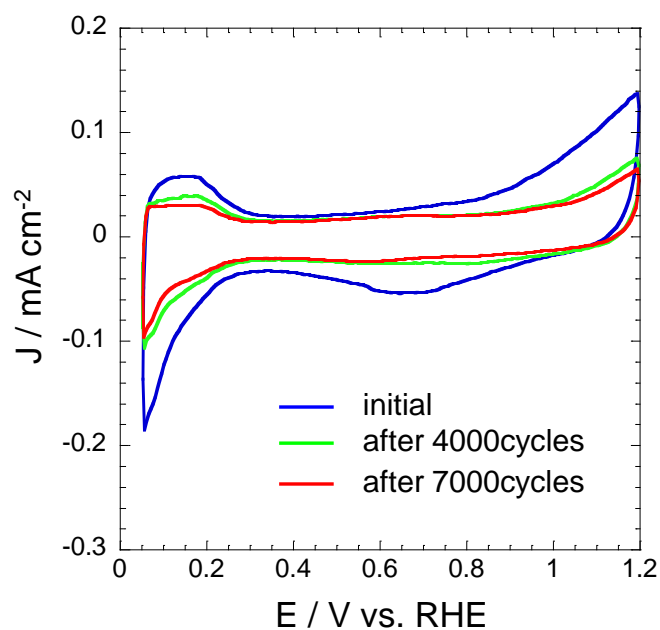

(b) Pt@In<sub>2</sub>O<sub>3</sub>/C

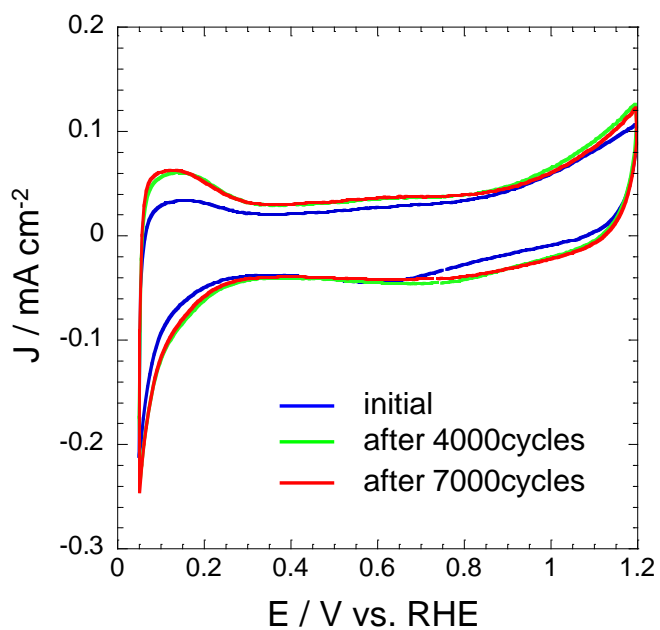

**Fig. S6** Cyclic voltammograms of bare Pt/C (a) or Pt@In<sub>2</sub>O<sub>3</sub>/C composites (b) in 0.10 mol dm<sup>-3</sup> HClO<sub>4</sub> aqueous solution degassed with N<sub>2</sub> during the accelerated durability test of fuel cells. Potential sweep rate: 10 mV s<sup>-1</sup>.
